# Supplementary material for: Valproic Acid Treatment after Traumatic Brain Injury in Mice Alleviates Neuronal Death and Inflammation in Association with Increased Plasma Lysophosphatidylcholines
Source: MDPI journal article supplement (doi:10.3390/cells13090734), 2024-04-23

Figure 1A

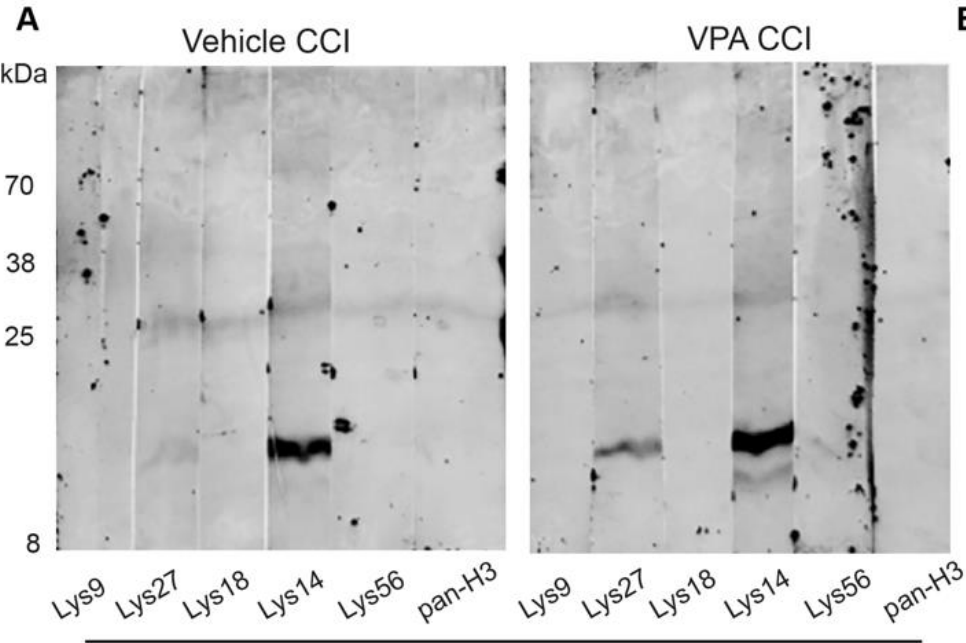

Original image

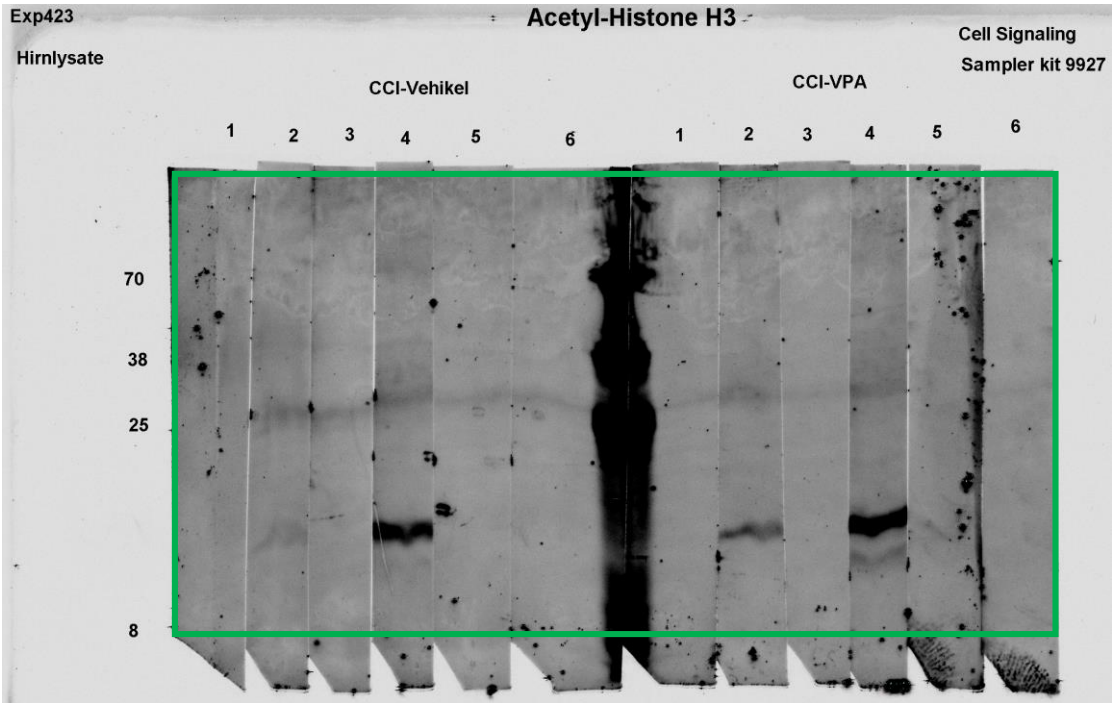

Figure 4A

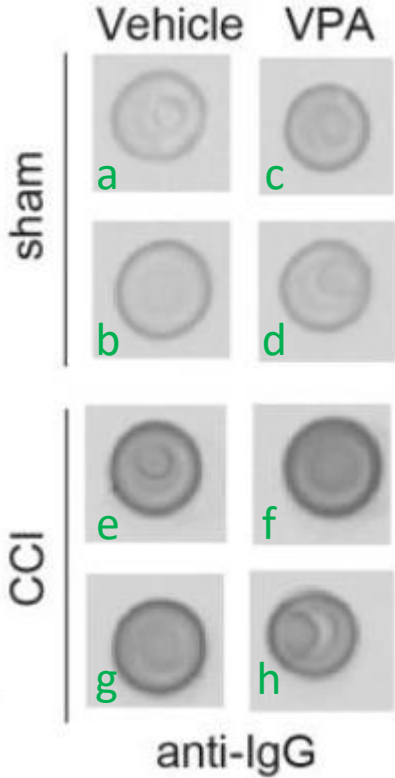

Original image

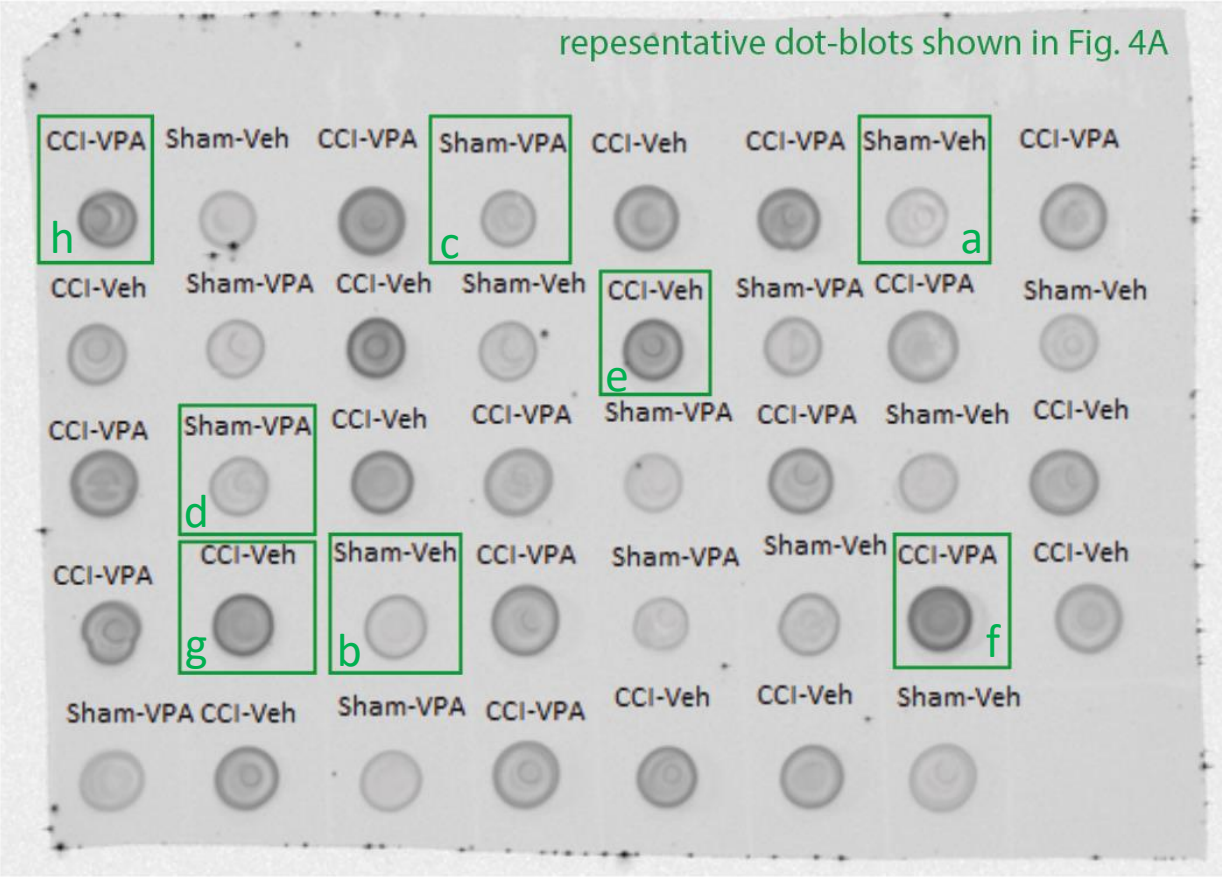

Figure 4C

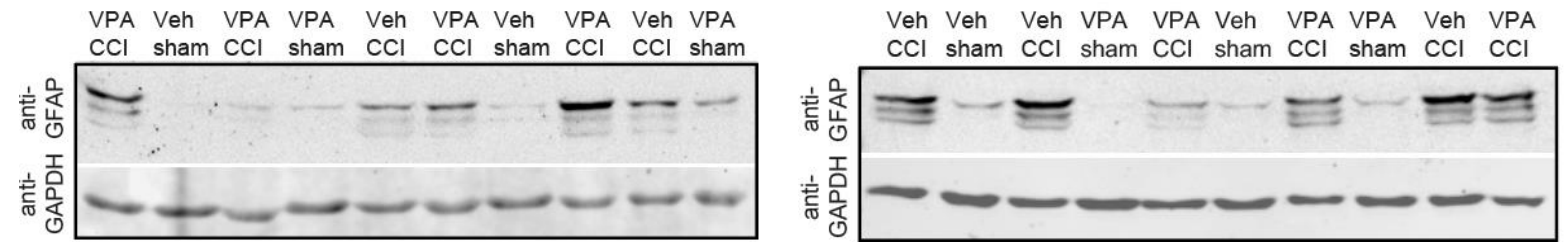

Original images

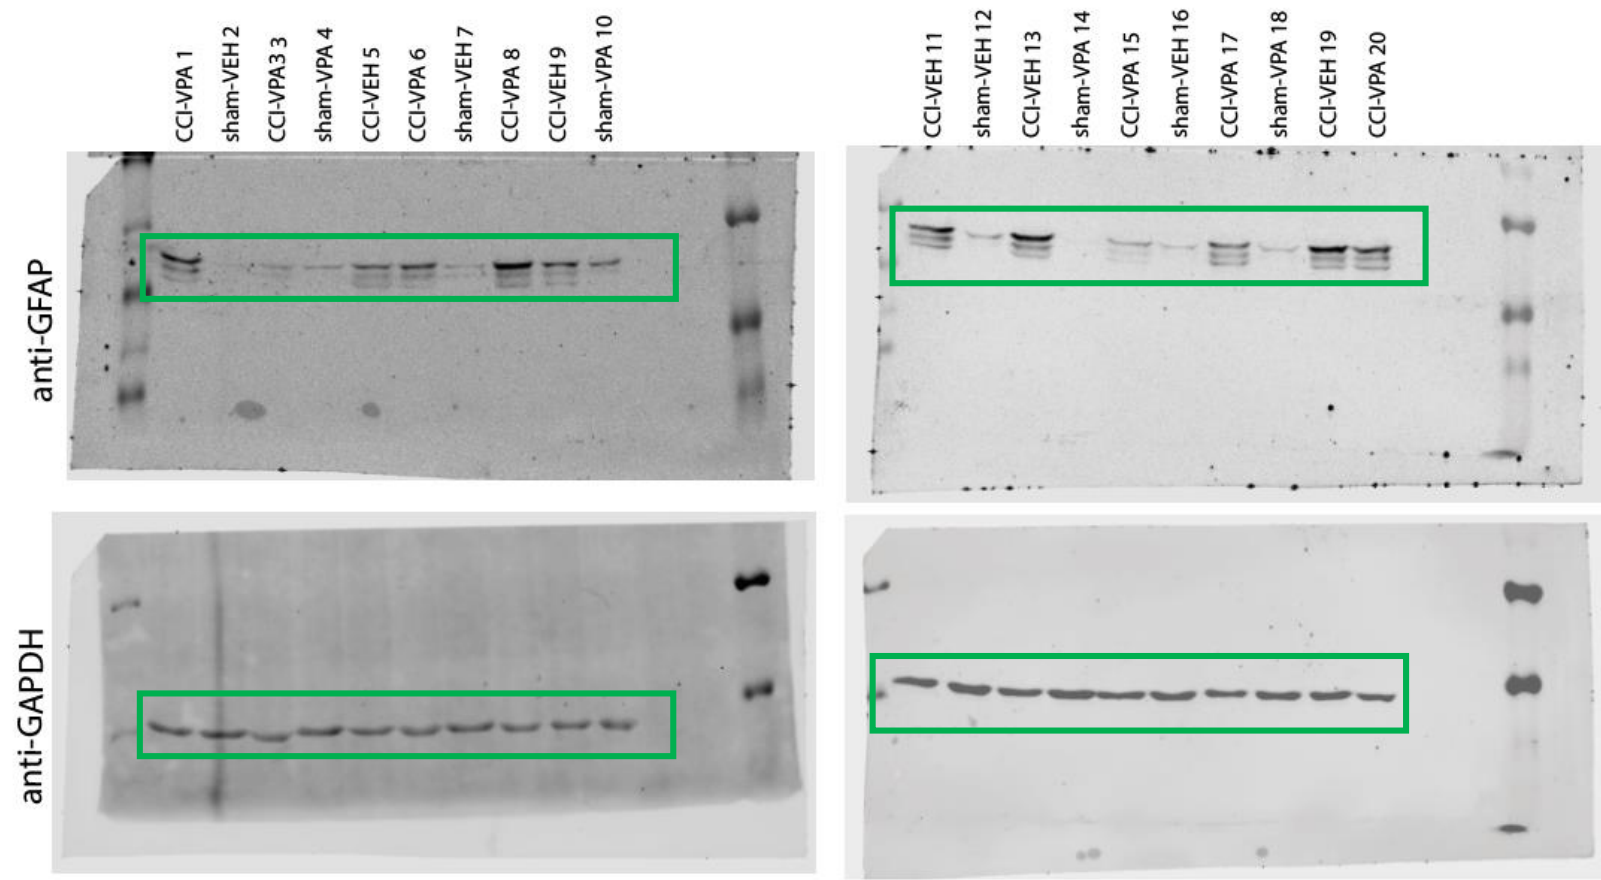

Figure 4C

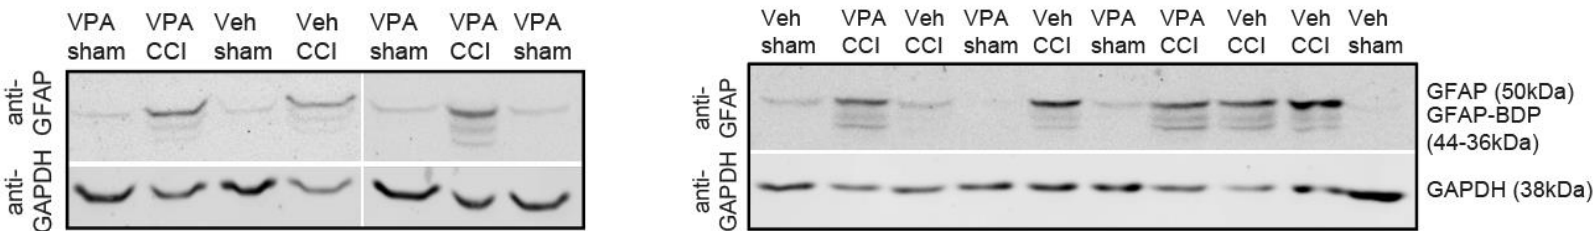

Original images

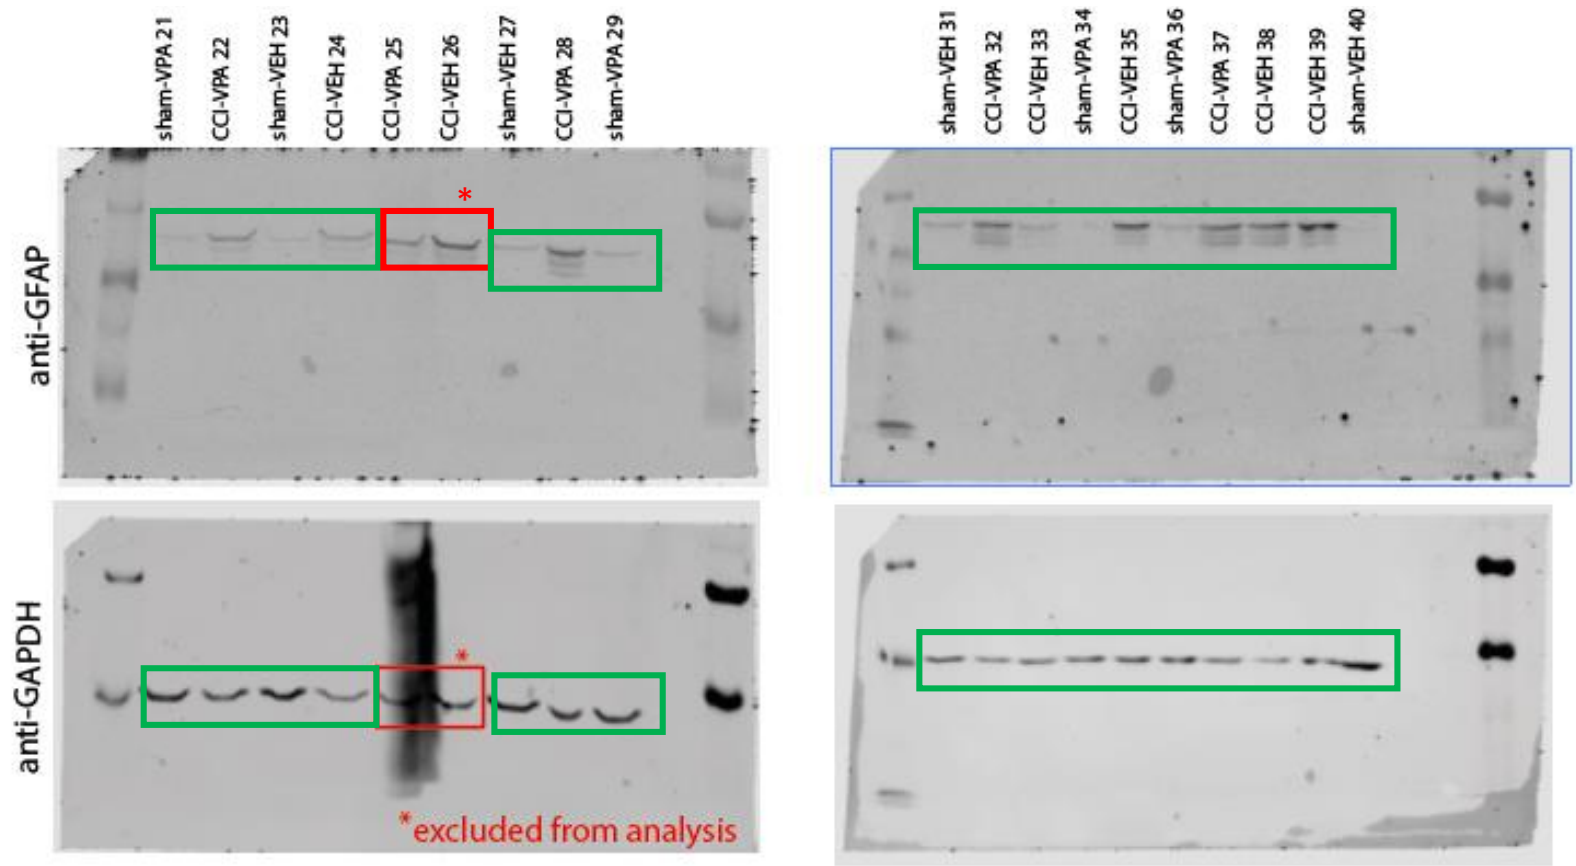

Supplement: s1 [file s1]
